# Supplementary material for: Nobiletin Promotes Megakaryocytic Differentiation through the MAPK/ERK-Dependent EGR1 Expression and Exerts Anti-Leukemic Effects in Human Chronic Myeloid Leukemia (CML) K562 Cells
Source: PubMed Central journal article supplement (PMC7226785; doi:10.3390/cells9040877), 2020-04-03
Supplement: cells-09-00877-s001.pdf [file cells-09-00877-s001.pdf]

# Supplemental Table and Figures

**Table S1.** Genes associated with the regulation of cell differentiation categories based on biological process Gene Ontology terms (GO:0030154) in NOB-treated cells

| GO:0030154 cell differentiation |          |              |                                                                                              |               |             |
|---------------------------------|----------|--------------|----------------------------------------------------------------------------------------------|---------------|-------------|
| Entrez                          | Gene     | Gene         | Description                                                                                  | log2(NOB/veh) | P.Value     |
| 3728                            | JUP      | Homo sapiens | junction plakoglobin (JUP)                                                                   | 1.015446874   | 0.000560126 |
| 5972                            | REN      | Homo sapiens | renin (REN)                                                                                  | 4.688939344   | 0.000972917 |
| 84519                           | ACRBP    | Homo sapiens | acrosin binding protein (ACRBP)                                                              | 1.935054539   | 0.004706668 |
| 55558                           | PLXNA3   | Homo sapiens | plexin A3 (PLXNA3)                                                                           | 1.009524998   | 0.004690686 |
| 2353                            | FOS      | Homo sapiens | FBJ murine osteosarcoma viral oncogene homolog (FOS)                                         | 1.446624408   | 0.016395884 |
| 23557                           | SNAPIN   | Homo sapiens | SNAP-associated protein (SNAPIN)                                                             | 1.063109542   | 0.002845361 |
| 4669                            | NAGLU    | Homo sapiens | N-acetylglucosaminidase, alpha (NAGLU)                                                       | 1.136129709   | 0.020508447 |
| 2539                            | G6PD     | Homo sapiens | glucose-6-phosphate dehydrogenase (G6PD)                                                     | 1.370946861   | 0.005279236 |
| 3630                            | INS      | Homo sapiens | insulin (INS)                                                                                | 1.137819011   | 0.019503071 |
| 155465                          | AGR3     | Homo sapiens | anterior gradient 3 (AGR3)                                                                   | 1.213749448   | 0.018661039 |
| 139818                          | DOCK11   | Homo sapiens | dedicator of cytokinesis 11 (DOCK11)                                                         | 1.059155715   | 0.011288381 |
| 50488                           | MINK1    | Homo sapiens | missshapen-like kinase 1 (MINK1)                                                             | 1.134419889   | 0.007038157 |
| 84541                           | KBTBD8   | Homo sapiens | kelch repeat and BTB (POZ)                                                                   | 1.036083464   | 0.009487995 |
| 604                             | BCL6     | Homo sapiens | B-cell CLL/lymphoma 6 (BCL6)                                                                 | 1.123888358   | 0.006743723 |
| 8788                            | DLK1     | Homo sapiens | delta-like 1 homolog (Drosophila)                                                            | 1.042075762   | 0.033549338 |
| 90780                           | PYGO2    | Homo sapiens | pygopus family PHD finger 2 (PYGO2)                                                          | 1.125216542   | 0.028596043 |
| 1808                            | DPYSL2   | Homo sapiens | dihydropyrimidinase-like 2 (DPYSL2)                                                          | 1.058032264   | 0.01342628  |
| 10628                           | TXNIP    | Homo sapiens | thioredoxin interacting protein (TXNIP)                                                      | 1.08571141    | 0.00742551  |
| 8878                            | SQSTM1   | Homo sapiens | sequestosome 1 (SQSTM1)                                                                      | 1.800805079   | 0.010282196 |
| 3949                            | LDLR     | Homo sapiens | low density lipoprotein receptor (LDLR)                                                      | 1.158016023   | 0.002666508 |
| 23462                           | HEY1     | Homo sapiens | hes-related family bHLH transcription factor with YRPW motif 1 (HEY1)                        | 1.29188211    | 0.018298234 |
| 8367                            | HIST1H4E | Homo sapiens | histone cluster 1, H4e (HIST1H4E)                                                            | 1.511190701   | 0.002121614 |
| 374                             | AREG     | Homo sapiens | amphiregulin (AREG)                                                                          | 1.486808556   | 0.002382524 |
| 29967                           | LRP12    | Homo sapiens | low density lipoprotein receptor-related protein 12 (LRP12)                                  | 1.159624494   | 0.007691869 |
| 1958                            | EGR1     | Homo sapiens | early growth response 1 (EGR1)                                                               | 2.096691475   | 0.000151493 |
| 4914                            | NTRK1    | Homo sapiens | neurotrophic tyrosine kinase, receptor, type 1 (NTRK1)                                       | 1.585217562   | 0.007705859 |
| 1745                            | DLX1     | Homo sapiens | distal-less homeobox 1 (DLX1)                                                                | 1.338549848   | 0.014740884 |
| 89870                           | TRIM15   | Homo sapiens | tripartite motif containing 15 (TRIM15)                                                      | 1.417739845   | 0.04036217  |
| 84498                           | FAM120B  | Homo sapiens | family with sequence similarity 120B (FAM120B)                                               | 1.332204712   | 0.003469503 |
| 1026                            | CDKN1A   | Homo sapiens | cyclin-dependent kinase inhibitor 1A (p21, Cip1)                                             | 1.122675687   | 0.002089364 |
| 595                             | CCND1    | Homo sapiens | cyclin D1 (CCND1)                                                                            | 1.224818015   | 0.006339606 |
| 5376                            | PMP22    | Homo sapiens | peripheral myelin protein 22 (PMP22)                                                         | 1.184640384   | 0.011663354 |
| 6709                            | SPTAN1   | Homo sapiens | spectrin, alpha, non-erythrocytic 1 (SPTAN1)                                                 | 1.479887278   | 0.010561901 |
| 4804                            | NGFR     | Homo sapiens | nerve growth factor receptor (NGFR)                                                          | 1.082282607   | 0.002361953 |
| 1209                            | CLPTM1   | Homo sapiens | cleft lip and palate associated transmembrane protein 1 (CLPTM1)                             | 1.208345942   | 0.012477485 |
| 5846                            | ITFG2    | Homo sapiens | integrin alpha FG-GAP repeat containing 2 (ITFG2)                                            | 1.425805781   | 0.005214441 |
| 3859                            | KRT12    | Homo sapiens | keratin 12, type I (KRT12)                                                                   | 1.123472358   | 0.000303459 |
| 124936                          | CYBS2    | Homo sapiens | cytochrome b5 domain containing 2 (CYBS2)                                                    | 1.142792422   | 0.022415991 |
| 117144                          | CATSPER1 | Homo sapiens | cation channel, sperm associated 1 (CATSPER1)                                                | 1.618677386   | 0.001371362 |
| 348262                          | FAM195B  | Homo sapiens | family with sequence similarity 195, member B (FAM195B)                                      | 1.164210445   | 0.008100045 |
| 114990                          | VASN     | Homo sapiens | vasonin (VASN)                                                                               | 1.819085044   | 7.45803E-05 |
| 440730                          | TRIM67   | Homo sapiens | tripartite motif containing 67 (TRIM67)                                                      | 2.482245123   | 0.000429643 |
| 5971                            | RELB     | Homo sapiens | v-rel avian reticuloendotheliosis viral oncogene homolog B (RELB)                            | 1.264028218   | 0.00255135  |
| 9751                            | SNPH     | Homo sapiens | syntrophin (SNPH)                                                                            | 1.564350272   | 0.003144849 |
| 1649                            | DDIT3    | Homo sapiens | DNA-damage-inducible transcript 3 (DDIT3)                                                    | 1.130333498   | 0.002685445 |
| 10011                           | SRA1     | Homo sapiens | steroid receptor RNA activator 1 (SRA1)                                                      | 1.026300324   | 0.031628077 |
| 1672                            | DEFB1    | Homo sapiens | defensin, beta 1 (DEFB1)                                                                     | 1.386701551   | 0.008515238 |
| 2348                            | FOLR1    | Homo sapiens | folate receptor 1 (adult)                                                                    | 1.129825363   | 0.000473935 |
| 5047                            | PAEP     | Homo sapiens | progesterone-associated endometrial protein (PAEP)                                           | 4.423336674   | 0.000724436 |
| 79143                           | MBOAT7   | Homo sapiens | membrane bound O-acyltransferase domain containing 7 (MBOAT7)                                | 1.215895961   | 0.045702877 |
| 104                             | ADARB1   | Homo sapiens | adenosine deaminase, RNA-specific, B1 (ADARB1)                                               | 1.217802454   | 0.025855128 |
| 6711                            | SPTBN1   | Homo sapiens | spectrin, beta, non-erythrocytic 1 (SPTBN1)                                                  | 1.103758372   | 0.005970047 |
| 79583                           | TMEM231  | Homo sapiens | transmembrane protein 231 (TMEM231)                                                          | 1.021957524   | 0.0300268   |
| 4593                            | MUSK     | Homo sapiens | muscle, skeletal, receptor tyrosine kinase (MUSK)                                            | 1.346857981   | 0.026796274 |
| 114112                          | TXNRD3   | Homo sapiens | thioredoxin reductase 3 (TXNRD3)                                                             | 1.071068576   | 0.025289711 |
| 91624                           | NEXN     | Homo sapiens | nexlin (F actin binding protein)                                                             | 1.246404215   | 0.003651497 |
| 55686                           | MREG     | Homo sapiens | melanoregulin (MREG)                                                                         | 1.257187494   | 0.026804404 |
| 4208                            | MEF2C    | Homo sapiens | myocyte enhancer factor 2C (MEF2C)                                                           | 1.277901364   | 0.002241676 |
| 30846                           | EHD2     | Homo sapiens | EH-domain containing 2 (EHD2)                                                                | 1.209048781   | 0.036908078 |
| 2676                            | GFRA3    | Homo sapiens | GDNF family receptor alpha 3 (GFRA3)                                                         | 1.032430174   | 0.006188036 |
| 27089                           | UQCRO    | Homo sapiens | ubiquinol-cytochrome c reductase, complex III subunit VII, 9.5kDa (UQCRO)                    | 1.219189515   | 0.000879907 |
| 2934                            | GSN      | Homo sapiens | gelsolin (GSN)                                                                               | 1.198174263   | 0.001490973 |
| 1746                            | DLX2     | Homo sapiens | distal-less homeobox 2 (DLX2)                                                                | 1.821783245   | 0.00824667  |
| 373863                          | DND1     | Homo sapiens | DND microRNA-mediated repression inhibitor 1 (DND1)                                          | 1.072432141   | 0.017361437 |
| 3275                            | PRMT2    | Homo sapiens | protein arginine methyltransferase 2 (PRMT2)                                                 | 1.160195215   | 0.00679929  |
| 1200                            | TPP1     | Homo sapiens | tripeptidyl peptidase 1 (TPP1)                                                               | 1.090002863   | 0.008265547 |
| 841                             | CASP8    | Homo sapiens | caspase 8, apoptosis-related cysteine peptidase (CASP8)                                      | 1.037888357   | 0.004478083 |
| 8111                            | GPR68    | Homo sapiens | G protein-coupled receptor 68 (GPR68)                                                        | -1.062694759  | 0.004149002 |
| 58504                           | ARHGAP22 | Homo sapiens | Rho GTPase activating protein 22 (ARHGAP22)                                                  | -1.272570436  | 0.000290855 |
| 5080                            | PAX6     | Homo sapiens | paired box 6 (PAX6)                                                                          | -1.243246391  | 0.018591152 |
| 3344                            | FOXP2    | Homo sapiens | forkhead box P2 (FOXP2)                                                                      | -1.398259125  | 0.000156594 |
| 51083                           | GAL      | Homo sapiens | galanin/GMAP prepropeptide (GAL)                                                             | -1.495179891  | 0.00452711  |
| 4603                            | MYBL1    | Homo sapiens | v-myb avian myeloblastosis viral oncogene homolog-like 1 (MYBL1)                             | -1.26383029   | 0.000788154 |
| 81029                           | WNT5B    | Homo sapiens | wingless-type MMTV integration site family, member 5B (WNT5B)                                | -1.119367746  | 0.015223216 |
| 3635                            | INPP5D   | Homo sapiens | inositol polyphosphate-5-phosphatase, 145kDa (INPP5D)                                        | -1.552457686  | 0.019068985 |
| 3479                            | IGF1     | Homo sapiens | insulin-like growth factor 1 (somatomedin C)                                                 | -1.098545428  | 0.032352419 |
| 1284                            | COL4A2   | Homo sapiens | collagen, type IV, alpha 2 (COL4A2)                                                          | -1.160808969  | 0.018687929 |
| 2335                            | FN1      | Homo sapiens | fibronectin 1 (FN1)                                                                          | -1.113676845  | 0.003769139 |
| 55897                           | MESP1    | Homo sapiens | mesoderm posterior basic helix-loop-helix transcription factor 1 (MESP1)                     | -1.167025081  | 0.00813489  |
| 55363                           | HEMGN    | Homo sapiens | hemoglobin (HEMGN)                                                                           | -1.574336873  | 0.001393631 |
| 5979                            | RET      | Homo sapiens | ret proto-oncogene (RET)                                                                     | -1.349978774  | 0.023284118 |
| 5176                            | SERPINF1 | Homo sapiens | serpin peptidase inhibitor, clade F (alpha-2 antiplasmin, pigment epithelium derived factor) | -1.043250123  | 0.002150593 |
| 948                             | CD36     | Homo sapiens | CD36 molecule (thrombospondin receptor)                                                      | -1.027043015  | 0.001370957 |
| 5228                            | PGF      | Homo sapiens | placental growth factor (PGF)                                                                | -1.017137361  | 0.026938104 |
| 660                             | BMX      | Homo sapiens | BMX non-receptor tyrosine kinase (BMX)                                                       | -2.263989688  | 0.000260815 |
| 4435                            | CITED1   | Homo sapiens | Cbp/p300-interacting transactivator, with Glu/Asp-rich carboxy-terminal domain, 1 (CITED1)   | -1.065146762  | 0.001332212 |
| 3953                            | LEPR     | Homo sapiens | leptin receptor (LEPR)                                                                       | -1.034431826  | 0.003157256 |
| 1374                            | CPT1A    | Homo sapiens | carnitine palmitoyltransferase 1A (liver)                                                    | -1.310765248  | 0.000586885 |
| 983                             | CDK1     | Homo sapiens | cyclin-dependent kinase 1 (CDK1)                                                             | -1.016681189  | 0.011218565 |
| 1830                            | DSG3     | Homo sapiens | desmoglein 3 (DSG3)                                                                          | -1.035070118  | 0.005375953 |
| 122953                          | JDP2     | Homo sapiens | Jun dimerization protein 2 (JDP2)                                                            | -1.330424076  | 0.045462813 |
| 4233                            | MET      | Homo sapiens | MET proto-oncogene, receptor tyrosine kinase (MET)                                           | -1.135425463  | 0.009444073 |
| 100130733                       | LRRC70   | Homo sapiens | leucine rich repeat containing 70 (LRRC70)                                                   | -1.324251354  | 0.002076197 |
| 729920                          | ISPD     | Homo sapiens | isoprenoid synthase domain containing (ISPD)                                                 | -1.069930476  | 0.023100202 |

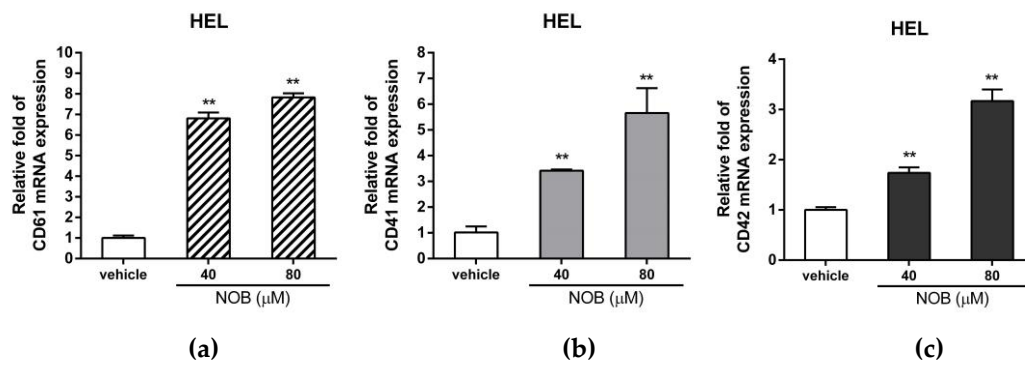

**Figure S1.** Effects of NOB on the mRNA expression of megakaryocytic differentiation markers in HEL 92.1.7 cells. The HEL cells were treated with vehicle or NOB (40 and 80  $\mu\text{M}$ ) for 96 h. The mRNA levels of (A) CD61 (B) CD41 (C) CD42a were measured by Q-RT-PCR analysis and normalized to GAPDH control expression. The data represent the mean  $\pm$  SD of three independent experiments.  $**p < 0.01$  represents significant differences compared with the vehicle-treated cells.

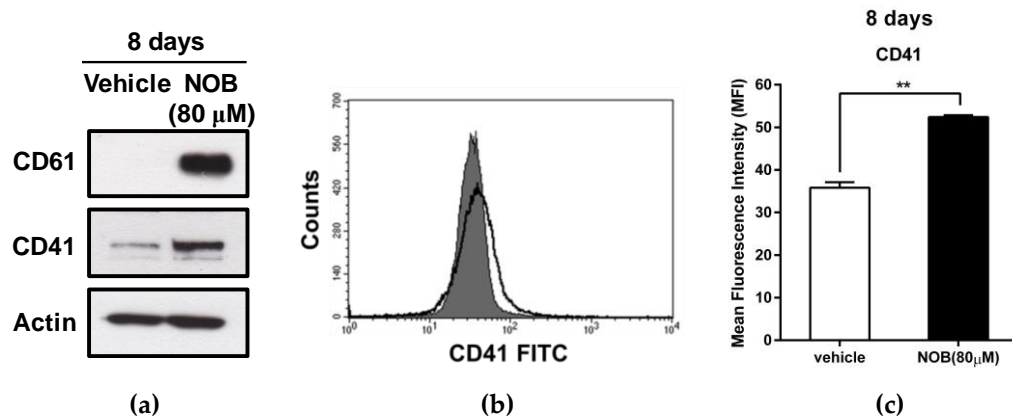

**Figure S2.** Effects of NOB treatment for 8 days on the protein expression of CD61 and CD41 in K562 cells. Cells were treated with vehicle or NOB (80 μM) for 8 days. **(a)** The protein expression of CD61, CD41 and actin was measured by Western blot analysis. The immunoblots were performed at three independent experiments. A represent blot is shown. **(b)** The level of cell-surface CD41 was measured by flow cytometric analysis. The representative histograms are shown. **(c)** The amounts of cell-surface CD41 protein was expressed as the geometric mean fluorescence intensity (MFI). The data represent the mean ± SD of two independent experiments. \*\* $p < 0.01$  represent significant differences compared with the vehicle-treated cells.

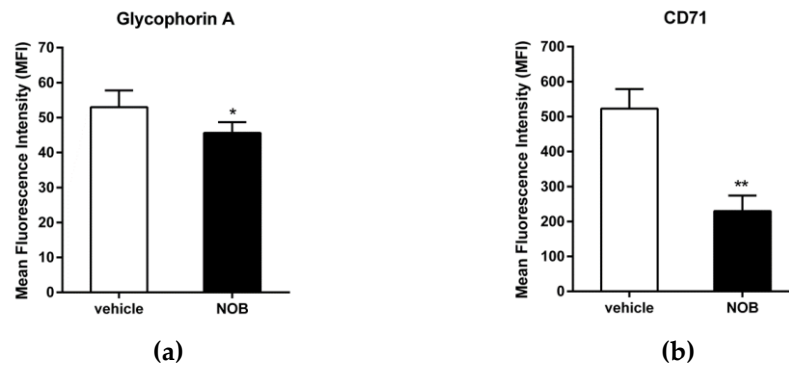

**Figure S3.** Effects of NOB on the protein expression of erythrocytic differentiation markers in K562 cells. The amount of cell-surface proteins of **(a)** glycophorin A **(b)** CD71 were measured by flow cytometric analysis and the data was expressed as the geometric mean fluorescence intensity (MFI). The data represent the mean  $\pm$  SD of three independent experiments. \* $p < 0.05$  and \*\* $p < 0.01$  represent significant differences compared to the vehicle-treated cells.

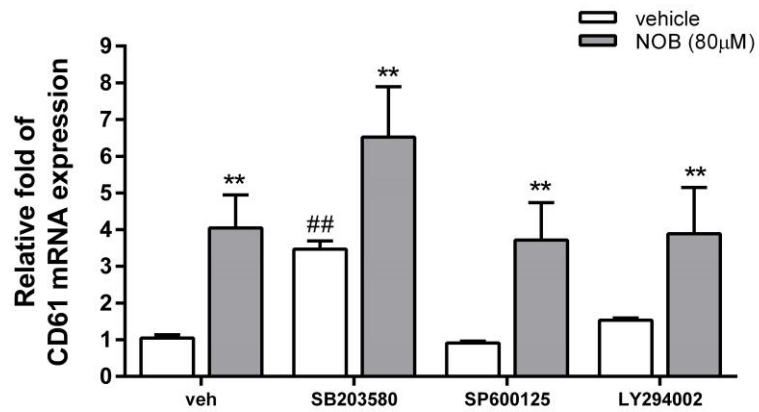

**Figure S4.** Effects of NOB on kinase signaling pathways in K562 cells. K562 cells were pre-treated with 0.1% DMSO (vehicle, veh) or inhibitors SB203580, SP600125 or LY294002 for 30 min followed by treatment of NOB (80 µM) for 48 h. The mRNA expression of CD 61 was determined by Q-RT-PCR. \*\* $p < 0.01$  represent significant differences compared to the inhibitor alone-treated cells. ## $p < 0.01$  represents significant differences compared to vehicle alone-treated cells (veh).
